# Supplementary material for: Ciliary IFT80 balances canonical versus non-canonical hedgehog signalling for osteoblast differentiation
Source: PubMed Central journal article supplement (PMC4802171; doi:10.1038/ncomms11024), 2016-03-21
Supplement: ncomms11024-s1.pdf [file ncomms11024-s1.pdf]

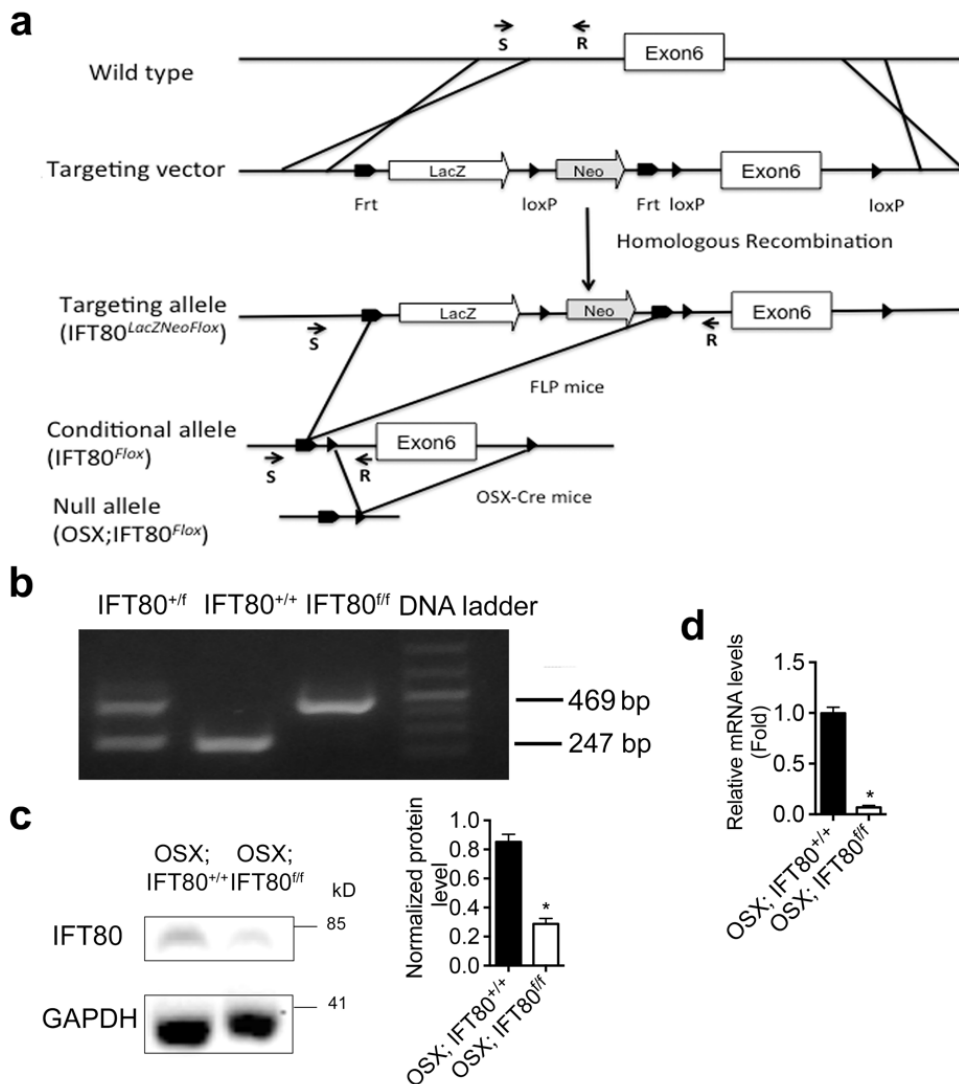

**Supplementary Figure 1. OSX-Cre-mediated conditional deletion of *IFT80* from the floxed *IFT80* allele ( $IFT80^{floxed}$ ).** (a) Schematic illustration of the wild-type, floxed *IFT80* allele ( $IFT80^{floxed}$ ) and *IFT80* mutant ( $OSX; IFT80^{ff}$ ). The targeting vector contains a 5.59 kb left arm homology, a Frt-flanked *Neo* reporter gene and *LacZ* gene, a loxP-flanked exon 6 of *IFT80*, and a 4 kb right arm homology.  $IFT80^{LacZNeoFloxed}$  mice were mated with *FLP* transgenic mice to delete the *neo* gene and *LacZ* gene and generated  $IFT80^{floxed}$  alleles. Deletion of the loxP cassette was achieved by Cre-mediated recombination. (b) Genotyping PCR analysis of  $IFT80^{ff}$ ,  $IFT80^{+/+}$  and  $IFT80^{+/+}$  alleles. The bands corresponding to the targeted mutation without *neo* gene and *LacZ* gene ( $IFT80^{floxed}$ ) is 469 bp and the bands corresponding to wild-type ( $IFT80^{+/+}$ ) is 247 bp. (c) Western blot analysis of *IFT80* expression in calvarial bone from both  $OSX; IFT80^{+/+}$  mice and  $OSX; IFT80^{ff}$  mice. *IFT80* protein level was normalized to *GAPDH* (n = 3 mice per group). (d) qPCR analysis of total *IFT80* transcripts in cultured OPCs derived from  $OSX; IFT80^{+/+}$  mice and  $OSX; IFT80^{ff}$  mice. The expression of *IFT80* is normalized to *GAPDH* expression (n = 4 mice per group). Data points indicate the means, while error bars represent s.e.m. \* $P < 0.001$  as determined by Student's *t*-test.

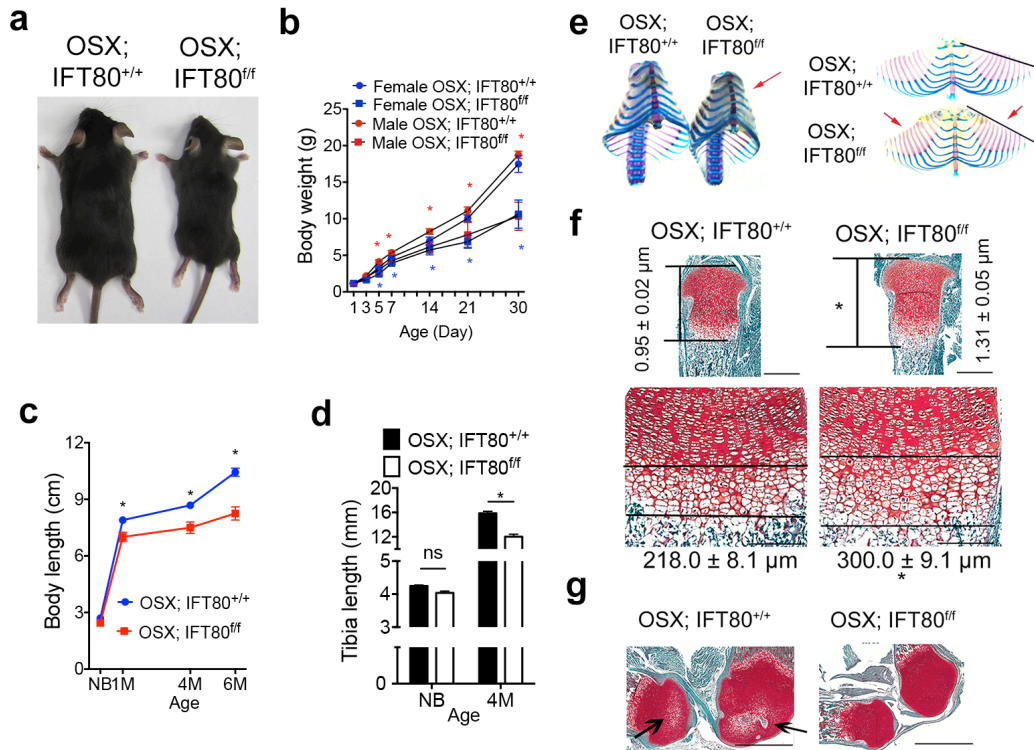

**Supplementary Figure 2. Deletion of *IFT80* causes a significant growth retardation and altered cartilage development.** (a) Appearance of OSX; IFT80<sup>+/+</sup> mice and OSX; IFT80<sup>ff</sup> mice. (b) Body weight of OSX; IFT80<sup>+/+</sup> mice and OSX; IFT80<sup>ff</sup> mice (n = 6 mice per group, mean ± s.e.m, \*P<0.01 versus age and sex matched OSX; IFT80<sup>+/+</sup> mice, multiple *t*-test). (c) Body length of OSX; IFT80<sup>+/+</sup> and OSX; IFT80<sup>ff</sup> mice at different ages. Body length was measured from nose to the base of the tail. OSX; IFT80<sup>ff</sup> mice displayed significantly lower body length from 1 month (n = 5 mice per group, mean ± s.e.m, \*P<0.01, multiple *t*-test). (d) Tibia length of OSX; IFT80<sup>+/+</sup> and OSX; IFT80<sup>ff</sup> mice at newborn and 4-month old (n = 6 mice per group, mean ± s.e.m, \*P<0.0001, Student's *t*-test). (e) The skeletons of P14 OSX; IFT80<sup>+/+</sup> and OSX; IFT80<sup>ff</sup> mice were stained with Alizarin Red S for bone, followed by Alcian blue staining for cartilage. Narrow rib cage in OSX; IFT80<sup>ff</sup> mice were found (indicated by red arrows). (f) Safranin O staining of the tibia section of newborn OSX; IFT80<sup>+/+</sup> and OSX; IFT80<sup>ff</sup> mice. OSX; IFT80<sup>ff</sup> mice displays longer cartilage (red), especially hypertrophic cartilage (lower panel) than those in OSX; IFT80<sup>+/+</sup> mice (n = 4 mice per group, mean ± s.e.m, \*P<0.001, Student's *t*-test). Scale bars represent 500 μm (top) or 200 μm (bottom). (g) Safranin O staining the tibia and femur section of P14 OSX; IFT80<sup>+/+</sup> and OSX; IFT80<sup>ff</sup> mice. Arrows show the secondary ossification center formation. Scale bars represent 1 mm.

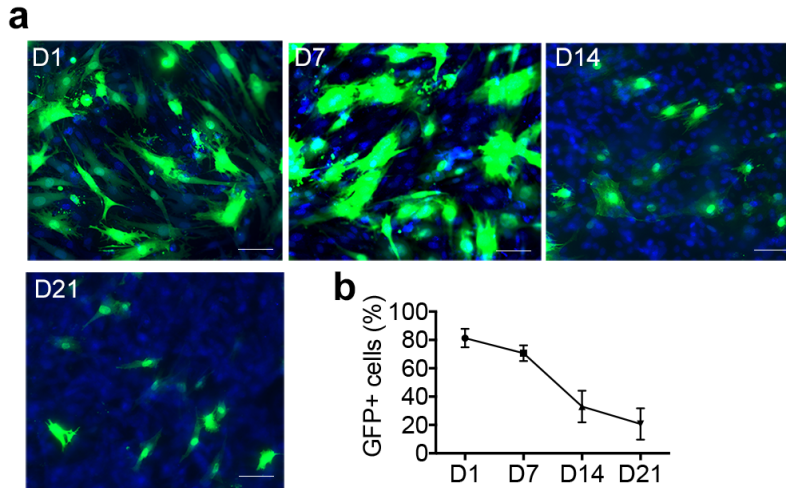

**Supplementary Figure 3. GFP positive cells in Ad-GFP transfected group during OB differentiation.** (a) Wild-type OPCs were transfected with Ad-GFP and then induce for osteogenesis. Cells were fixed at Day 1, 7, 14 and 21 to analyze the GFP positive cells. DAPI (nuclear marker) staining is used as counterstaining. Scale bars represent 100  $\mu\text{m}$ . (b) Quantification of GFP positive cells population shown in a (n=3 with at least 500 cells analyzed per time point). Data points indicate the means, while error bars represent s.e.m.

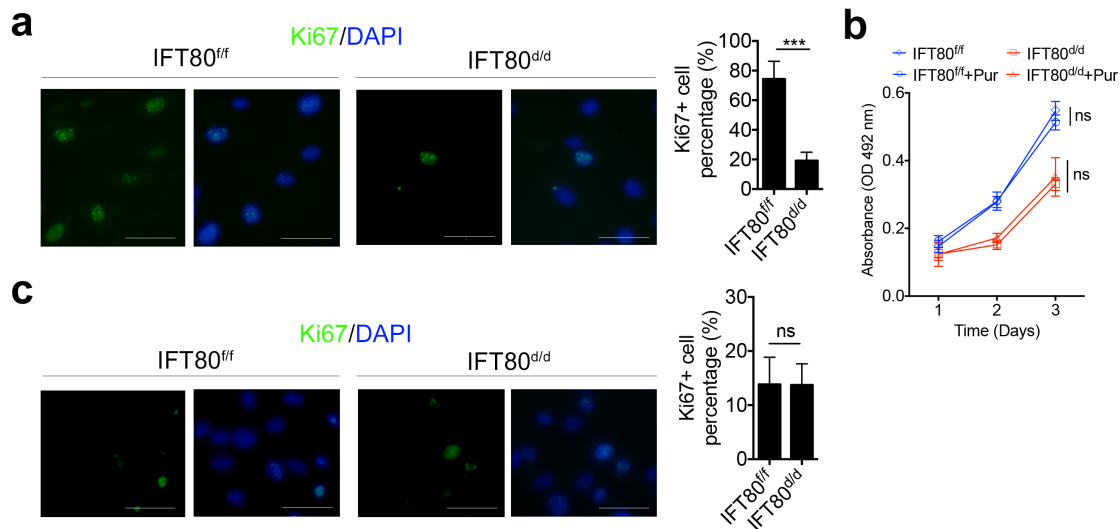

**Supplementary Figure 4. Cell proliferation assay.** (a) Ki67 (green) staining of IFT80<sup>ff</sup> and IFT80<sup>d/d</sup> OPCs at the density of 500 cells per  $\text{mm}^2$ . DAPI staining is used as counterstaining to calculate the total cell numbers (n=3 with at least 200 cells analyzed). Scale bars represent 50  $\mu\text{m}$ . (b) Proliferation (MTS) assay of IFT80<sup>ff</sup> and IFT80<sup>d/d</sup> OPCs treated with or without purmorphamine (Pur). The starting cell density is 100 cells per  $\text{mm}^2$  (n=3, triplicates per group). (c) Ki67 (green) staining of IFT80<sup>ff</sup> and IFT80<sup>d/d</sup> OPCs at the density of 1000 cells per  $\text{mm}^2$  (subconfluent). DAPI staining is used as counterstaining to calculate the total cell numbers (n=3 with at least 200 cells analyzed). Scale bars represent 50  $\mu\text{m}$ . Data points indicate the means, while error bars represent s.e.m. \*\*\*P<0.0001 as determined by Student's *t*-test. ns: not statistically significant.

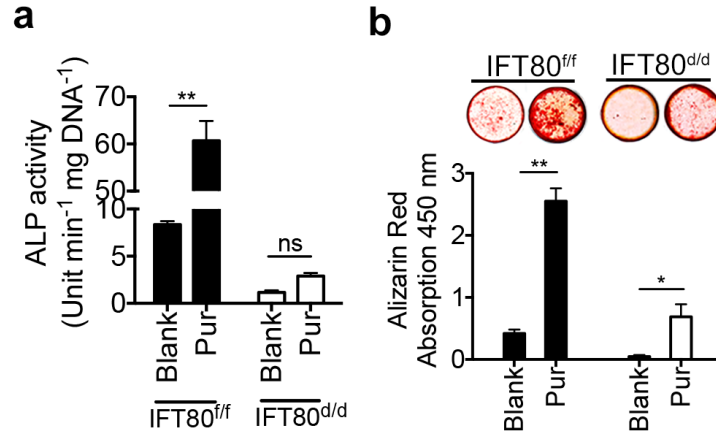

**Supplementary Figure 5. Purmorphamine only partially rescues the *IFT80<sup>d/d</sup>* OB differentiation.** (a) ALP activity of *IFT80<sup>ff/ff</sup>* and *IFT80<sup>d/d</sup>* OPCs at day 7 of osteogenic induction with or without purmorphamine (Pur) stimulation (n = 4, triplicates per group). (b) Alizarin Red of *IFT80<sup>ff/ff</sup>* and *IFT80<sup>d/d</sup>* OPCs at day 14 of osteogenic induction with or without purmorphamine (Pur) stimulation (n = 3, triplicates per group). Data points indicate the means, while error bars represent s.e.m. Data were analyzed using Two-way ANOVA followed by Tukey multiple comparison test. \*P<0.01, \*\*P<0.0001. ns: not statistically significant.

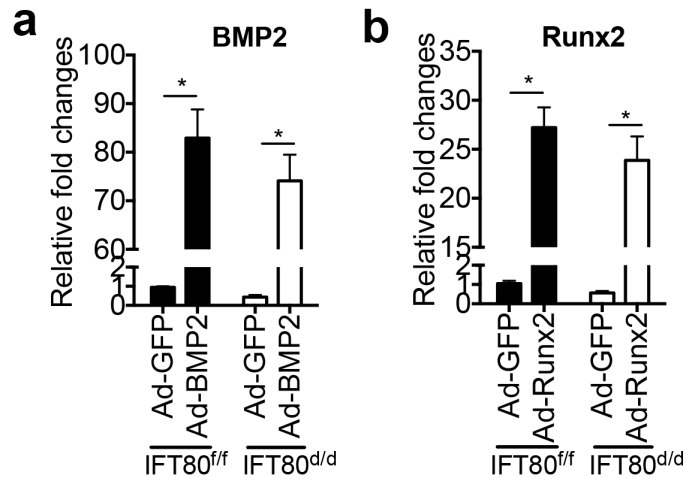

**Supplementary Figure 6. Test Ad-BMP2 or Ad-Runx2 virus on *IFT80<sup>ff/ff</sup>* and *IFT80<sup>d/d</sup>* OPCs.** (a) qPCR result showing *BMP2* expression in *IFT80<sup>ff/ff</sup>* and *IFT80<sup>d/d</sup>* OPCs after transfected with BMP2 adenoviruses (n = 3, triplicates per group). (b) qPCR result showing *RUNX2* expression in *IFT80<sup>ff/ff</sup>* and *IFT80<sup>d/d</sup>* OPCs after transfected with RUNX2 adenoviruses (n = 3, triplicates per group). Data points indicate the means, while error bars represent s.e.m. \*P<0.001. Data were analyzed using Two-way ANOVA followed by Tukey multiple comparison test.

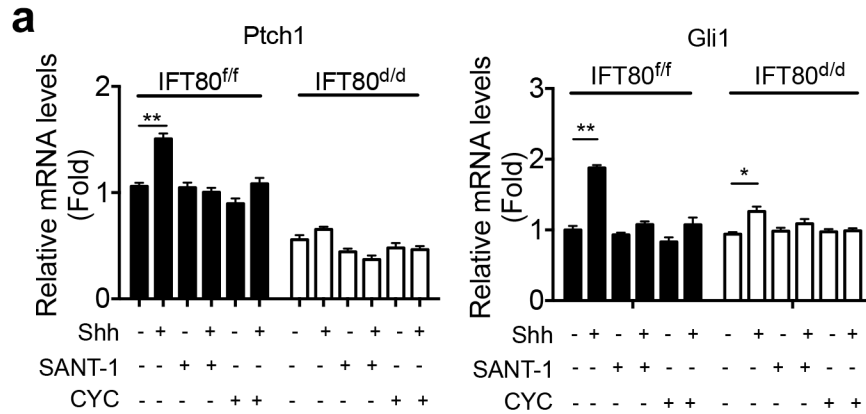

**Supplementary Figure 7. SANT-1 and cyclopamine inhibits canonical Hh signaling.** (a) qPCR results showing *Ptch1* and *Gli1* expression in *IFT80<sup>ff/ff</sup>* and *IFT80<sup>d/d</sup>* OPCs that treated with SANT-1 and cyclopamine (CYC). Data points indicate the means, while error bars represent s.e.m. Data were analyzed using Two-way ANOVA followed by Tukey multiple comparison test. \*P<0.01, \*\*P<0.0001.

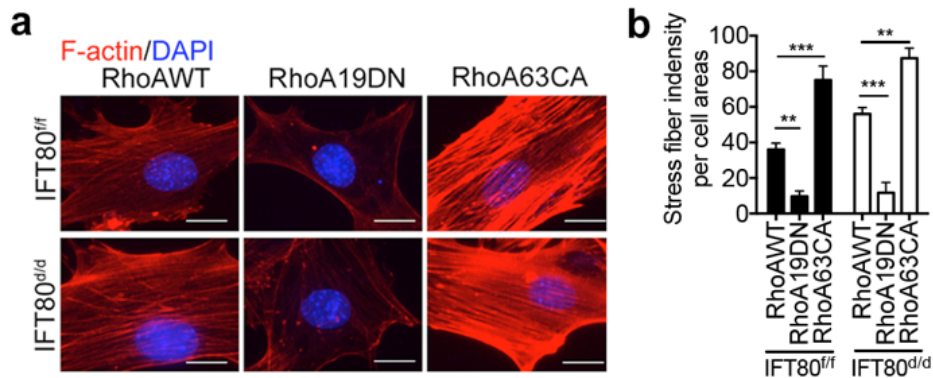

**Supplementary Figure 8. Dominant negative RhoA (RhoA19DN) transfection inhibits stress fiber formation while constitutive active RhoA (RhoA63CA) promotes stress fiber formation.** (a) *IFT80<sup>ff/ff</sup>* and *IFT80<sup>d/d</sup>* OPCs were stained to visualize stress fiber (red) and the nucleus (blue) after transfected with RhoAWT, RhoA19DN, or RhoA63CA plasmid. Scale bars represent 25  $\mu$ m. (b) Graph quantifying the number of stress fibers shown in a (n = 3 with at least 15 cells analyzed). Data points indicate the means, while error bars represent s.e.m. Data were analyzed using Two-way ANOVA followed by Tukey multiple comparison test. \*\*P<0.01, \*\*\*P<0.0001.

Fig.2d

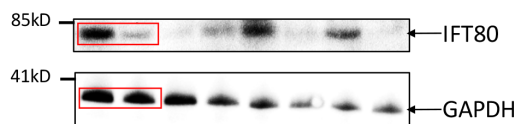

Fig. 2h

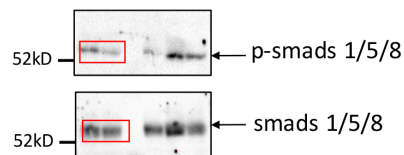

Fig.4g

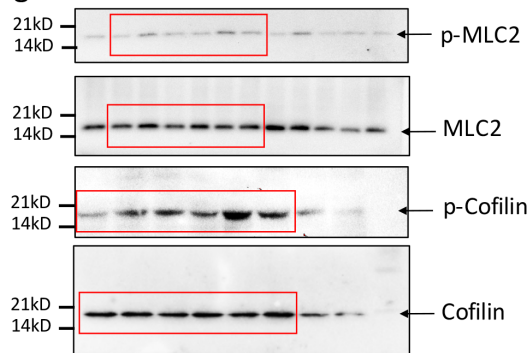

Fig.5b

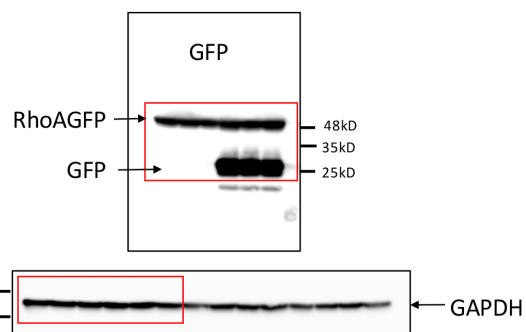

Fig 6d

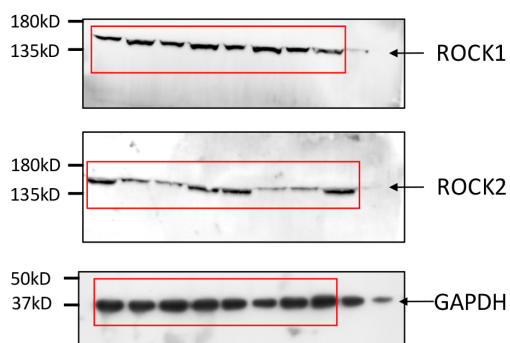

Fig.7e

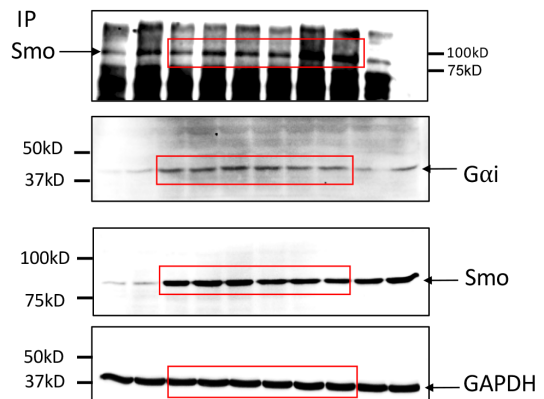

Supplementary Figure 9. Uncropped Western Blots.

**Supplementary table 1. List of primers used in this study.**

| Gene        | Forward primer sequence   | Reverse primer sequence | Length |
|-------------|---------------------------|-------------------------|--------|
| IFT80       | AAGGAACCAAAGCATCAAGAATTAG | AGATGTCATCAGGCAGCTTGAC  | 148 bp |
| Runx2       | ACAACCACAGAACCACAAG       | TCTCGGTGGCTGGTAGTA      | 106 bp |
| osterix     | AGCGACCACTTGAGCAAACAT     | GCGGCTGATTGGCTTCTTCT    | 121 bp |
| osteocalcin | AAGCAGGAGGGCAATAAGGT      | ACTTGCAGGGCAGAGAGAGA    | 274 bp |
| Gli1        | GGTCTCGGGGTCTCAAACCTG     | CCATTCTCTGGTGGGGTTCC    | 184 bp |
| Ptch1       | GACCGGCCTTGCCTCAACCC      | CAGGGCGTGAGCGCTGACAA    | 204 bp |
| BMP2        | TCCGCTCCACAAACGAGAAA      | AAAGGCATGATAGCCCGGAG    | 148 bp |
| GAPDH       | TGTGTCCGTCGTGGATCTGA      | TTGCTGTTGAAGTCGCAGGAG   | 150 bp |
